# Supplementary material for: Alternating Magnetic Field-Triggered Switchable Nanofiber Mesh for Cancer Thermo-Chemotherapy
Source: MDPI journal article supplement (doi:10.3390/polym10091018), 2018-09-13
Supplement: s1 [file s1]

## Supplementary Information

# Alternating Magnetic Field-triggered Switchable Nanofiber Mesh for Cancer Thermo-chemotherapy

Eri Niiyama<sup>1,2</sup>, Koichiro Uto<sup>3</sup>, Chun Man Lee<sup>4</sup>, Kazuma Sakura<sup>4</sup>, and Mitsuhiro Ebara<sup>1,2,5\*</sup>

<sup>1</sup> International Center for Materials Nanoarchitectonics (WPI-MANA), National Institute for Materials Science (NIMS), Tsukuba, Ibaraki 305-0044, Japan

<sup>2</sup> Graduate School of Pure and Applied Sciences, University of Tsukuba, Tsukuba, Ibaraki 305-8577, Japan

<sup>3</sup> International Center for Young Scientists (ICYS), National Institute for Materials Science (NIMS), Tsukuba, Ibaraki 305-0044, Japan

<sup>4</sup> Medical Center for Translational Research, Osaka University Hospital, Suita, Osaka 565-0871, Japan.

<sup>5</sup> Graduate School of Industrial Science and Technology, Tokyo University of Science, Katsushika-ku, Tokyo 125-8585, Japan.

**Table S1.** Characteristic data of poly(NIPAAm-co-HMAAm).

| Feed (mol%) |       | Contents (mol%) <sup>1</sup> |       | Mn <sup>2</sup>    | Mw <sup>2</sup>    | Mw/Mnm <sup>2</sup> |
|-------------|-------|------------------------------|-------|--------------------|--------------------|---------------------|
| NIPAAm      | HMAAm | NIPAAm                       | HMAAm |                    |                    |                     |
| 80          | 20    | 79                           | 21    | $4.99 \times 10^4$ | $1.39 \times 10^5$ | 2.78                |

<sup>1</sup> Measured by <sup>1</sup>H NMR. <sup>2</sup> Measured by GPC.

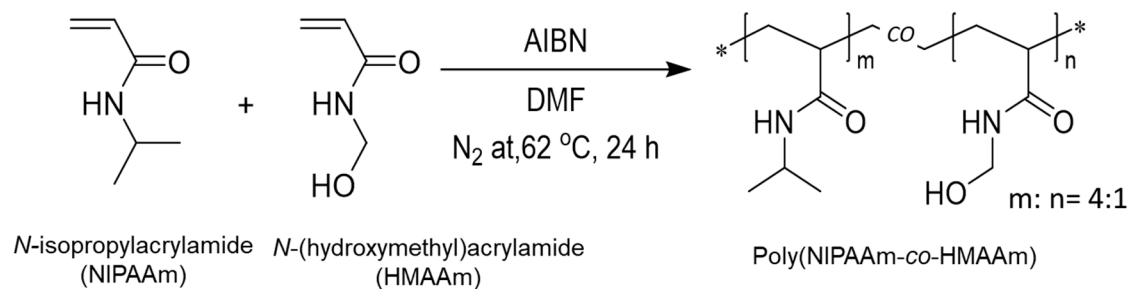

**Scheme S1.** Copolymerization of poly(NIPAAm-co-HMAAm).

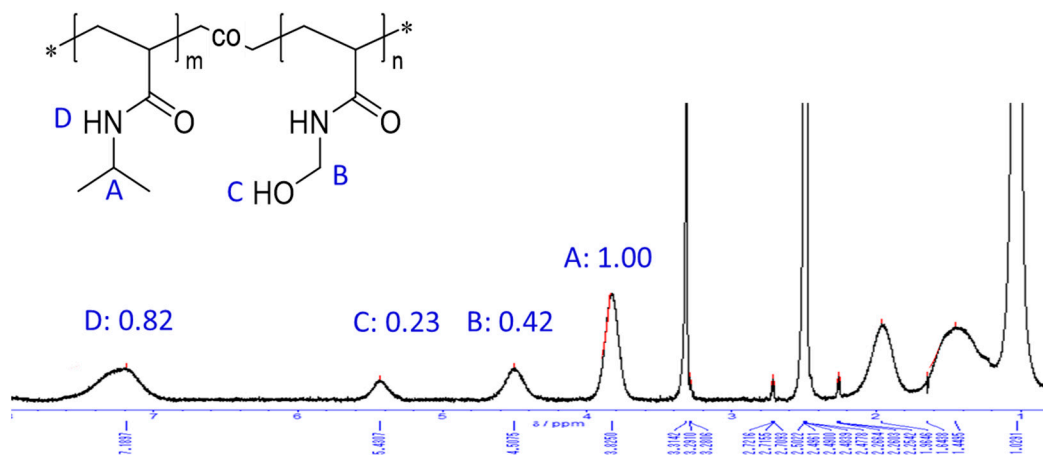

**Figure S1.** <sup>1</sup>H NMR spectrum of poly(NIPAAm-co-HMAAm).

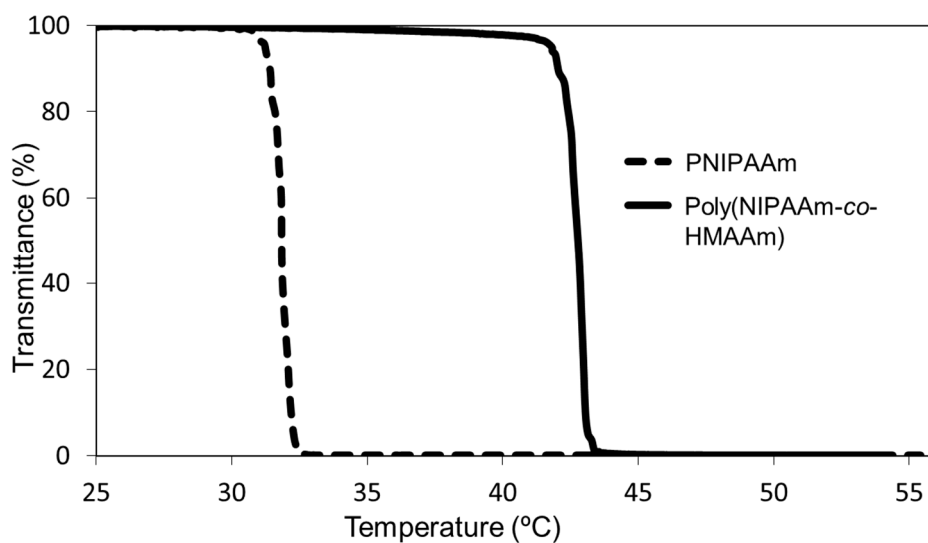

**Figure S2.** Temperature-dependent transmittance changes of PNIPAAm and poly(NIPAAm-co-HMAAm) solution.

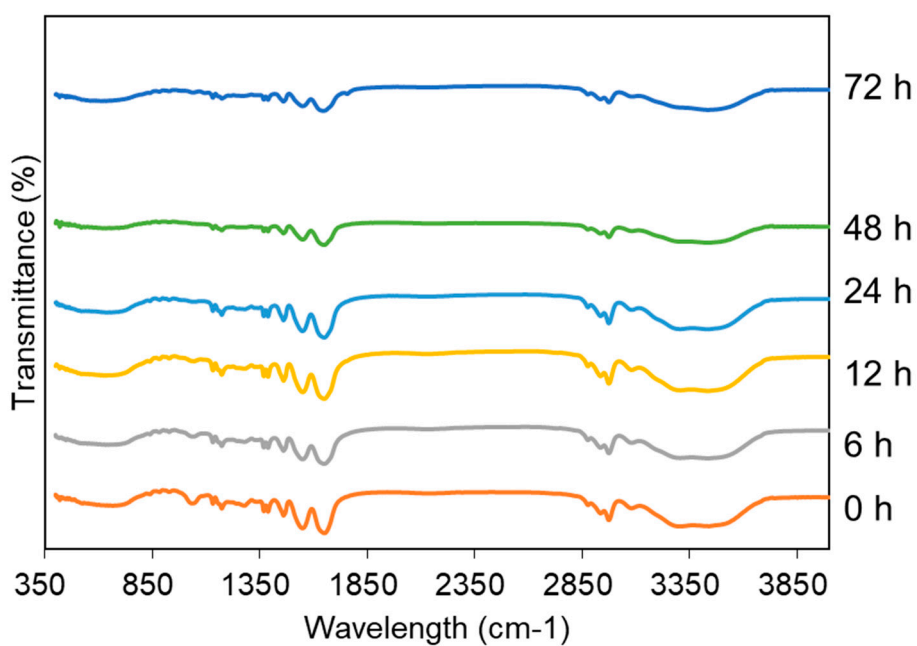

**Figure S3.** FTIR spectra of poly(NIPAAm-co-HMAAM) with different crosslinking time (0-72 h). Peak at 1050 and 3300  $\text{cm}^{-1}$  are assigned to the stretching of C-O-H and -OH groups in HMAAm, respectively.

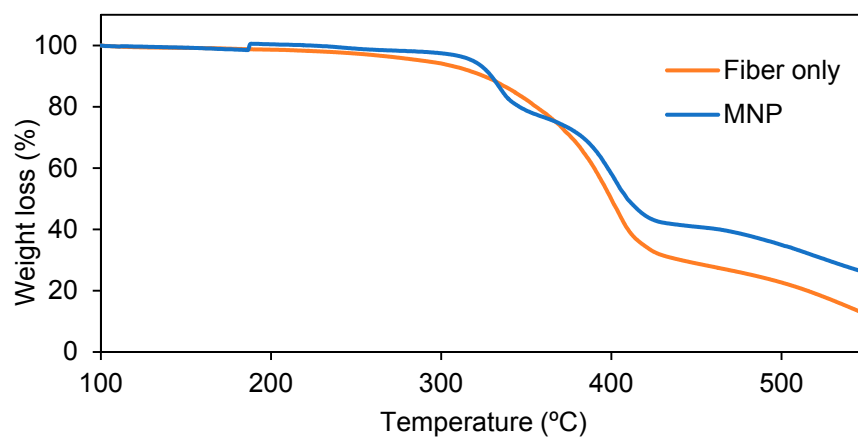

**Figure S4.** Thermal studies showing the TG curves for fiber only and MNP.

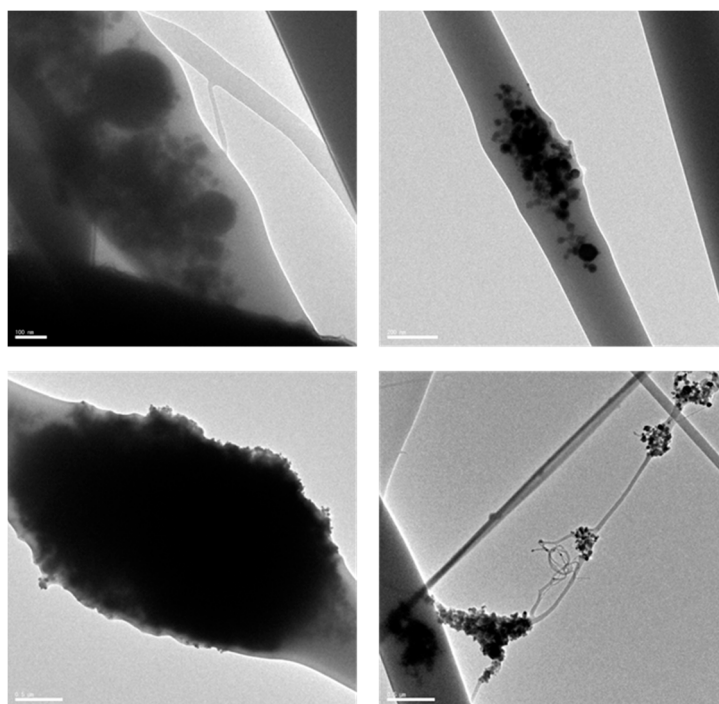

**Figure S5.** TEM observation of fiber with 60 wt % of MNPs. A scale bar is 500 nm.

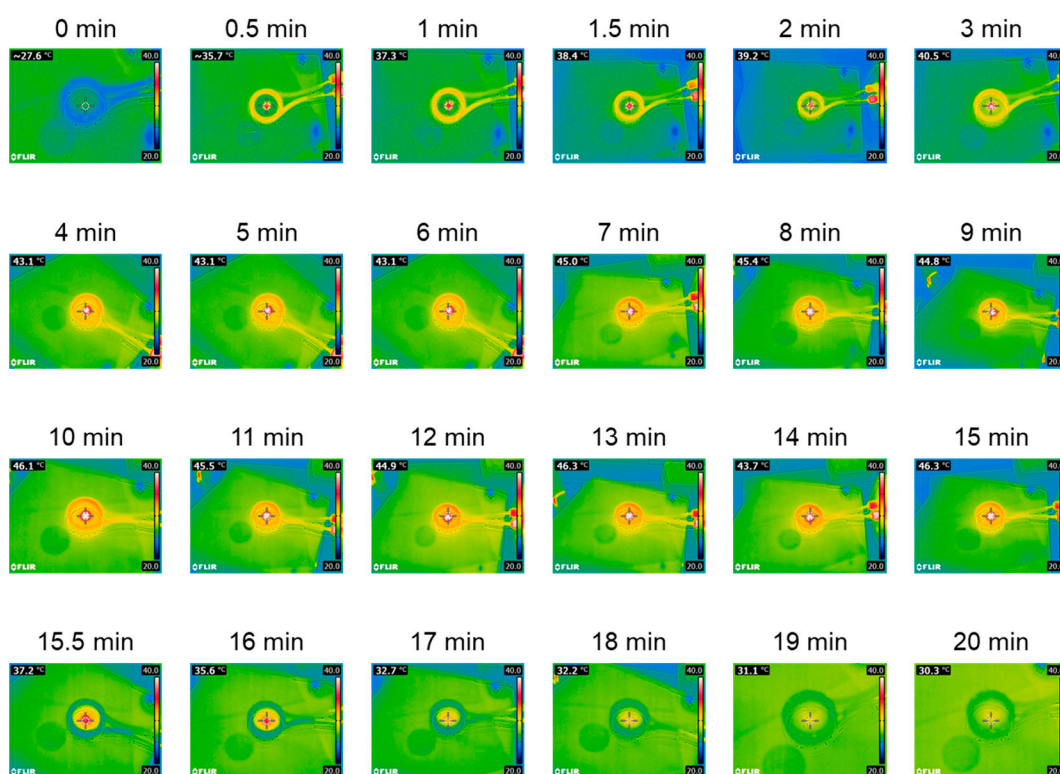

**Figure S6.** IR thermal images of the MNPs-incorporated fiber mesh in AMF. The AMF was turned on at time 0-min and turned off at time 15-min.

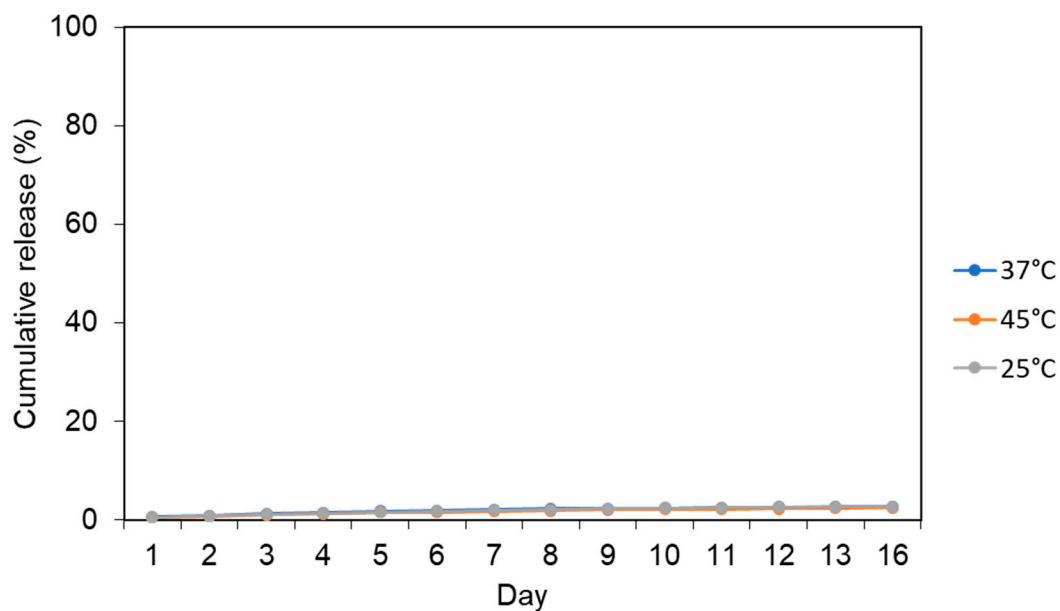

**Figure S7.** Long term drug release from the fiber mesh at 25 °C, 37 °C, and 43 °C.
